# Supplementary material for: Maternal Obesity and Offspring Long-Term Infectious Morbidity
Source: PubMed Central journal article supplement (PMC6780342; doi:10.3390/jcm8091466), 2019-09-14
Supplement: jcm-08-01466-s001.pdf [file jcm-08-01466-s001.pdf]

**Supplementary Table – ICD-9 Codes of infectious morbidity**

| <b>Infectious Group</b>           | <b>Diag. code</b> | <b>Diagnosis description</b>                                         |
|-----------------------------------|-------------------|----------------------------------------------------------------------|
| <b>Urinary tract infections</b>   | 5901              | Acute pyelonephritis                                                 |
|                                   | 5950              | Acute cystitis                                                       |
|                                   | 5959              | Cystitis, unspecified                                                |
|                                   | 5970              | Urethral abscess                                                     |
|                                   | 5990              | Urinary tract infection, site not specified                          |
|                                   | 59010             | Acute pyelonephritis without lesion of renal medullary necrosis      |
|                                   | 59080             | Pyelonephritis, unspecified                                          |
|                                   | 59581             | Cystitis cystica                                                     |
|                                   | 59589             | Other specified types of cystitis                                    |
|                                   | 59780             | Urethritis, unspecified                                              |
|                                   | 59789             | Other urethritis                                                     |
|                                   | V1302             | Personal history of urinary (tract) infection                        |
| <b>Gastrointestinal infection</b> | 008               | Intestinal infections due to other organisms                         |
|                                   | 0030              | Salmonella gastroenteritis                                           |
|                                   | 0039              | Salmonella infection, unspecified                                    |
|                                   | 0040              | Shigella dysenteriae                                                 |
|                                   | 0041              | Shigella flexneri                                                    |
|                                   | 0042              | Shigella boydii                                                      |
|                                   | 0043              | Shigella sonnei                                                      |
|                                   | 0048              | Other specified shigella infections                                  |
|                                   | 0049              | Shigellosis, unspecified                                             |
|                                   | 0051              | Botulism                                                             |
|                                   | 0059              | Food poisoning, unspecified                                          |
|                                   | 0068              | Amebic infection of other sites                                      |
|                                   | 0069              | Amebiasis, unspecified                                               |
|                                   | 0070              | Balantidiasis                                                        |
|                                   | 0071              | Giardiasis                                                           |
|                                   | 0078              | Other specified protozoal intestinal diseases                        |
|                                   | 0079              | Unspecified protozoal intestinal disease                             |
|                                   | 0084              | Intestinal infection due to other specified bacteria                 |
|                                   | 0085              | Bacterial enteritis, unspecified                                     |
|                                   | 0088              | Intestinal infection due to other organism, not elsewhere classified |
|                                   | 0090              | Infectious colitis, enteritis, & gastroenteritis                     |
|                                   | 0090              | Infectious colitis, enteritis, and gastroenteritis                   |
|                                   | 0091              | Colitis, enteritis, gastroenteritis of presumed infectious origin    |
|                                   | 0092              | Infectious diarrhea                                                  |
|                                   | 129               | Intestinal parasitism, unspecified                                   |
|                                   | 00842             | Intestinal infection due to Pseudomonas                              |

|                                               |       |                                                                    |                                                              |
|-----------------------------------------------|-------|--------------------------------------------------------------------|--------------------------------------------------------------|
|                                               | 00843 | Intestinal infec. Due to campylobacter                             |                                                              |
|                                               | 00845 | Intestinal infec. Due to clostridium difficile                     |                                                              |
|                                               | 00861 | Enteritis due to rotavirus                                         |                                                              |
|                                               | 00862 | Enteritis due to adenovirus                                        |                                                              |
|                                               | 00865 | Enteritis due to calicivirus                                       |                                                              |
|                                               | 00867 | Enteritis due to enterovirus, n.e.c.                               |                                                              |
|                                               | 00869 | Other viral enteritis                                              |                                                              |
|                                               | 1274  | Enterobiasis                                                       |                                                              |
|                                               | 1278  | Mixed intestinal helminthiasis                                     |                                                              |
|                                               | 1279  | Intestinal helminthiasis, unspecified                              |                                                              |
|                                               | 1289  | Helminth infection, unspecified                                    |                                                              |
|                                               | 5902  | Renal and perinephric abscess                                      |                                                              |
|                                               | V023  | Carrier or susp.carrier of other gastrointestinal pathogens        |                                                              |
| <b>Central nervous system (CNS) infection</b> | 0022  | Paratyphoid fever b                                                |                                                              |
|                                               | 0023  | Paratyphoid fever c                                                |                                                              |
|                                               | 048   | Other enterovirus diseases of central nervous system               |                                                              |
|                                               | 320   | Bacterial meningitis                                               |                                                              |
|                                               | 322   | Meningitis of unspecified cause                                    |                                                              |
|                                               | 325   | Phlebitis and thrombophlebitis of intracranial venous sinuses      |                                                              |
|                                               | 326   | Late effects of intracranial abscess or pyogenic infection         |                                                              |
|                                               | 0470  | Meningitis due to coxsackie virus                                  |                                                              |
|                                               | 0471  | Meningitis due to echo virus                                       |                                                              |
|                                               | 0478  | Other specified viral meningitis                                   |                                                              |
|                                               | 0479  | Unspecified viral meningitis                                       |                                                              |
|                                               | 0491  | Non-arthropod-borne meningitis due to adenovirus                   |                                                              |
|                                               |       | 0499                                                               | Unsp.non-arthropod-borne viral dis.of central nervous system |
|                                               |       | 0630                                                               | Russian spring-summer (taiga) encephalitis                   |
|                                               | 3200  | Hemophilus meningitis                                              |                                                              |
|                                               | 3201  | Pneumococcal meningitis                                            |                                                              |
|                                               | 3202  | Streptococcal meningitis                                           |                                                              |
|                                               | 3203  | Staphylococcal meningitis                                          |                                                              |
|                                               | 3207  | Meningitis in other bacterial diseases classified elsewhere        |                                                              |
|                                               | 3208  | Meningitis due to other specified bacteria                         |                                                              |
|                                               | 3209  | Meningitis due to unspecified bacterium                            |                                                              |
|                                               | 3229  | Meningitis, unspecified                                            |                                                              |
|                                               | 3236  | Postinfectious encephalitis                                        |                                                              |
|                                               | 3238  | Other causes of encephalitis                                       |                                                              |
|                                               | 3238  | Other causes of encephalitis, myelitis and encephalomyelitis       |                                                              |
|                                               | 3239  | Unspecified cause of encephalitis                                  |                                                              |
|                                               | 3239  | Unspecified cause of encephalitis, myelitis, and encephalomyelitis |                                                              |

|                                             |       |                                                          |
|---------------------------------------------|-------|----------------------------------------------------------|
|                                             | 3240  | Intracranial abscess                                     |
|                                             | 3241  | Intraspinal abscess                                      |
|                                             | 3249  | Intracranial and intraspinal abscess of unspecified site |
|                                             | 06641 | West Nile fever with encephalitis                        |
|                                             | 32082 | Meningitis due to gram-negative                          |
|                                             | 32089 | Meningitis due to other specified bacteria               |
|                                             | 32361 | Infectious acute disseminated encephalomyelitis (ADEM)   |
|                                             | 32381 | Other causes of encephalitis and encephalomyelitis       |
|                                             | 32382 | Other causes of myelitis                                 |
|                                             | 0360  | Meningococcal meningitis                                 |
| <b>Extraintestinal salmonella infection</b> | 0031  | Salmonella septicemia                                    |
|                                             | 0038  | Other specified salmonella infections                    |
|                                             | 00321 | Salmonella meningitis                                    |
|                                             | 00323 | Salmonella arthritis                                     |
|                                             | 00329 | Other localized salmonella infections                    |
| <b>H. Pylori infection</b>                  | 04186 | Helicobacter pylori (h. Pylori) infection                |
| <b>Tuberculosis infection</b>               | 0119  | Unspecified pulmonary tuberculosis                       |
|                                             | 01090 | Prim. Tb. Infec., unsp.type, unsp.examination            |
|                                             | 01120 | Tb. Of lung + cavitation, unsp. Examination              |
|                                             | 01190 | Unsp. Pulmonary tb., unsp. Examination                   |
|                                             | 01194 | Unsp. Pulmonary tb., found by bacterial culture          |
|                                             | 01304 | Tb. Meningitis, found by bacterial culture               |
|                                             | 01311 | Tuberculoma of meninges, bact/histol. Exam. Not done     |
|                                             | 01394 | Unsp. Tb. Of c.n.s. found by bacterial culture           |
|                                             | 01404 | Tb. Peritonitis, found by bacterial culture              |
|                                             | 01485 | Other tb. Intestines, confirmed histologically           |
|                                             | V1201 | Personal history of tuberculosis                         |
| <b>Opportunistic rare infections</b>        | 022   | Anthrax                                                  |
|                                             | 0073  | Intestinal trichomoniasis                                |
|                                             | 0074  | Cryptosporidiosis                                        |
|                                             | 0075  | Cyclosporiasis                                           |
|                                             | 0082  | Intestinal infec. Due to aerobacter aerogenes            |
|                                             | 0205  | Pneumonic plague, unspecified                            |
|                                             | 0209  | Plague, unspecified                                      |
|                                             | 0783  | Cat-scratch disease                                      |
|                                             | 0810  | Murine (endemic) typhus                                  |
|                                             | 0820  | Spotted fevers                                           |
|                                             | 0830  | Q fever                                                  |
|                                             | 0838  | Other specified rickettsioses                            |
|                                             | 0839  | Rickettsiosis, unspecified                               |
|                                             | 00841 | Intestinal infec. Due to staphylococcus                  |
|                                             | 0846  | Malaria, unspecified                                     |

|                       |       |                                                                                                            |
|-----------------------|-------|------------------------------------------------------------------------------------------------------------|
|                       | 0859  | Leishmaniasis, unspecified                                                                                 |
|                       | 0879  | Relapsing fever, unspecified                                                                               |
|                       | 0909  | Congenital syphilis, unspecified                                                                           |
|                       | 0940  | Tabes dorsalis                                                                                             |
|                       | 0980  | Gonococcal infec.,acute, of lower genitourinary tract                                                      |
|                       | 1000  | Leptospirosis icterohemorrhagica                                                                           |
|                       | 1160  | Blastomycosis                                                                                              |
|                       | 1173  | Aspergillosis                                                                                              |
|                       | 1175  | Cryptococcosis                                                                                             |
|                       | 1177  | Zygomycosis (phycomycosis or mucormycosis)                                                                 |
|                       | 1179  | Other and unspecified mycoses                                                                              |
|                       | 1209  | Schistosomiasis, unspecified                                                                               |
|                       | 1225  | Echinococcus multilocularis infection of liver                                                             |
|                       | 1228  | Echinococcosis, unspecified, of liver                                                                      |
|                       | 1229  | Echinococcosis, other and unspecified                                                                      |
|                       | 1270  | Ascariasis                                                                                                 |
|                       | 1363  | Pneumocystosis                                                                                             |
|                       | 1369  | Unsp. Infectious & parasitic diseases                                                                      |
|                       | 1369  | Unspecified infectious and parasitic diseases                                                              |
|                       | 04183 | Other clostridium perfringens infection                                                                    |
|                       | 08881 | Lyme disease (erythema chronicum migrans)                                                                  |
|                       | 08882 | Babesiosis                                                                                                 |
|                       | 09840 | Gonococcal conjunctivitis (neonatorum)                                                                     |
|                       | 09882 | Gonococcal meningitis                                                                                      |
|                       | 09886 | Gonococcal peritonitis                                                                                     |
| <b>Brucellosis</b>    | 0239  | Brucellosis, unspecified                                                                                   |
|                       | 0269  | Unspecified rat-bite fever                                                                                 |
|                       | 0270  | Listeriosis                                                                                                |
|                       | 0312  | Disseminated disease due to other mycobacteria                                                             |
|                       | 0319  | Unspecified diseases due to mycobacteria                                                                   |
|                       | 03283 | Diphtheritic peritonitis                                                                                   |
| <b>Infections NOS</b> | 0418  | Other spec.bacterial inf;in condit.class.elsewhere,unsp.site                                               |
|                       | 0419  | Unsp. Bacterial infection, unsp. Site                                                                      |
|                       | 0419  | Unspec.bacterial inf;in condit. Classif.elsewhere,unsp.site                                                |
|                       | 04189 | Other specified bacteria infection                                                                         |
|                       | 99762 | Infection (chronic) of amputation stump                                                                    |
|                       | V091  | Infection with microorgan. Resistant to cephalosporins/b-lactam antibiotics                                |
|                       | V0980 | Infection with microorgan. Resistant to other spec. Drugs, without mention of resistance to multiple drugs |
|                       | V0991 | Infection with drug-resistant microorgan.,unspec. Drug resistance nos, with multiple drug resistance       |

|                                                    |                                |                                                               |                                      |
|----------------------------------------------------|--------------------------------|---------------------------------------------------------------|--------------------------------------|
| <b>Pertussis</b>                                   | 0330                           | Whooping cough due to bordetella pertussis (b. Pertussis)     |                                      |
|                                                    | 0331                           | Whooping cough due to bordetella parapertussis                |                                      |
|                                                    | 0339                           | Whooping cough, unspecified organism                          |                                      |
| <b>Streptococcus and staphylococcus infections</b> | 034                            | Streptococcal sore throat and scarlet fever                   |                                      |
|                                                    | 035                            | Erysipelas                                                    |                                      |
|                                                    | 0340                           | Streptococcal sore throat                                     |                                      |
|                                                    | 0341                           | Scarlet fever                                                 |                                      |
|                                                    | 0410                           | Streptococcus infect.in condition classif.elsewhere;unsp.site |                                      |
|                                                    | 0411                           | Staphylococcus infect.in condit.classif.elsewhere,unsp.site   |                                      |
|                                                    | 0411                           | Staphylococcus infection, unsp. Site                          |                                      |
|                                                    | 0412                           | Pneumococcus infect.in condition classif.elsewhere;unsp.site  |                                      |
|                                                    | 0412                           | Pneumococcus infection, unsp. Site                            |                                      |
|                                                    | 04100                          | Streptococcus infec., unsp.                                   |                                      |
|                                                    | 04101                          | Streptococcus infec., group a                                 |                                      |
|                                                    | 04101                          | Streptococcus infec., group a (additional code)               |                                      |
|                                                    | 04102                          | Streptococcus infec., group b                                 |                                      |
|                                                    | 04103                          | Streptococcus infec., group c                                 |                                      |
|                                                    | 04104                          | Streptococcus infec., group d (enterococcus)                  |                                      |
|                                                    | 04105                          | Streptococcus infec., group g                                 |                                      |
|                                                    | 04109                          | Other streptococcus infec.                                    |                                      |
|                                                    | 04110                          | Staphylococcus infection, unsp.                               |                                      |
|                                                    | 04111                          | Methicillin susceptible staphylococcus aureus                 |                                      |
|                                                    | 04111                          | Staphylococcus aureus infec.                                  |                                      |
|                                                    | 04111                          | Staphylococcus aureus infec. (additional code)                |                                      |
|                                                    | 04112                          | Methicillin resistant staphylococcus aureus                   |                                      |
|                                                    | 04119                          | Other staphylococcus infection                                |                                      |
|                                                    | V0252                          | Carrier or susp. Carrier of other streptococcus               |                                      |
|                                                    | V0259                          | Carrier/susp. Carrier of other specified bacterial dis.       |                                      |
|                                                    | <b>Meningococcal infection</b> | 0362                                                          | Meningococemia                       |
|                                                    |                                | 0369                                                          | Meningococcal infection, unspecified |
|                                                    |                                | 03682                                                         | Meningococcal arthropathy            |
| 03689                                              |                                | Other specified meningococcal infections                      |                                      |
| <b>Sepsis</b>                                      | 0380                           | Streptococcal septicemia                                      |                                      |
|                                                    | 0381                           | Staphylococcal septicemia                                     |                                      |
|                                                    | 0382                           | Pneumococcal septicemia                                       |                                      |
|                                                    | 0383                           | Septicemia due to anaerobes                                   |                                      |
|                                                    | 0388                           | Other specified septicemias                                   |                                      |
|                                                    | 0389                           | Unspecified septicemia                                        |                                      |
|                                                    | 03810                          | Staphylococcal speticemia, unsp.                              |                                      |
|                                                    | 03811                          | Methicillin susceptible staphylococcus aureus septicemia      |                                      |
|                                                    | 03811                          | Staphylococcus aureus septicemia                              |                                      |
|                                                    | 03812                          | Methicillin resistant staphylococcus aureus septicemia        |                                      |

|                                           |                    |                                                               |
|-------------------------------------------|--------------------|---------------------------------------------------------------|
|                                           | 03819              | Other staphylococcal septicemia                               |
|                                           | 03840              | Septicemia due to gram-negative organism, unspecified         |
|                                           | 03841              | Septicemia due to hemophilus influenzae (h. Influenzae)       |
|                                           | 03842              | Septicemia due to escherichia coli (e. Coli)                  |
|                                           | 03843              | Septicemia due to pseudomonas                                 |
|                                           | 03849              | Other septicemia due to gram-negative organisms               |
|                                           | 038491             | Klebsiella septicemia                                         |
|                                           | 0388 1             | Candida septicemia                                            |
|                                           | 0388 2             | Enterococcus septicemia                                       |
|                                           | 0388 3             | Acitinobacter septicemia                                      |
| <b>Gram-negative infection</b>            | 0413               | Friedlander's bacillus, unsp. Site                            |
|                                           | 0413               | Friedlander's bacillus;condition classif.elsewhere,unsp.site  |
|                                           | 0413               | Klebsiella pneumoniae                                         |
|                                           | 0414               | Escherichia coli (e. Coli), unsp. Site                        |
|                                           | 0414               | Escherichia coli (e. Coli), unsp. Site (additional code)      |
|                                           | 0414               | Escherichia coli(e. Coli),conditi.classif.elsewhere,unsp.site |
|                                           | 0415               | Hemophilus influenzae in condit.classif.elsewhere,unsp.site   |
|                                           | 0415               | Hemophilus influenzae, unsp. Site (h.influenzae)              |
|                                           | 0416               | Proteus (mirabilis,morganii), unsp. Site                      |
|                                           | 0416               | Proteus(mirabilis,morganii)condit,classif.elsewhere,unsp.site |
|                                           | 0417               | Pseudomonas infec., unsp. Site                                |
|                                           | 0417               | Pseudomonas infect.in condit.classif.elsewhere,unspec.site    |
|                                           | 04185              | Other gram-negative organisms infection                       |
| <b>Human immunodeficiency virus (HIV)</b> | 042                | Human immunodefic. Virus (hiv) dis. /aids                     |
|                                           | V08                | Asymptomatic h.i.v infection status                           |
| <b>Herpes, Varicella</b>                  | 0521               | Varicella (hemorrhagic) pneumonitis                           |
|                                           | 0527               | Chickenpox with other specified complications                 |
|                                           | 0528               | Chickenpox with unspecified complication                      |
|                                           | 0529               | Varicella without mention of complication                     |
|                                           | 0539               | Herpes zoster without mention of complication                 |
|                                           | 0540               | Eczema herpeticum                                             |
|                                           | 0542               | Herpetic gingivostomatitis                                    |
|                                           | 0543               | Herpetic meningoencephalitis                                  |
|                                           | 0546               | Herpetic whitlow                                              |
|                                           | 0549               | Herpes simplex without mention of complication                |
|                                           | 0559               | Measles without mention of complication                       |
|                                           | 0569               | Rubella without mention of complication                       |
|                                           | 0570               | Erythema infectiosum (fifth disease)                          |
|                                           | 0578               | Other specified viral exanthemata                             |
|                                           | 0579               | Viral exanthem, unspecified                                   |
| 0723                                      | Mumps pancreatitis |                                                               |

|                            |       |                                                                    |
|----------------------------|-------|--------------------------------------------------------------------|
|                            | 0729  | Mumps without mention of complication                              |
|                            | 0740  | Herpangina                                                         |
|                            | 0743  | Hand, foot, and mouth disease                                      |
|                            | 05311 | Geniculate herpes zoster                                           |
|                            | 05319 | Herpes zoster + other nervous system complications                 |
|                            | 05320 | Herpes zoster dermatitis of eyelid                                 |
|                            | 05329 | Herpes zoster + other ophthalmic complications                     |
|                            | 05410 | Genital herpes, unspecified                                        |
|                            | 05440 | Herpes simplex + unsp. Ophthalmic complication                     |
|                            | 05441 | Herpes simplex dermatitis of eyelid                                |
|                            | 05443 | Herpes simplex disciform keratitis                                 |
|                            | 05449 | Herpes simplex with other ophthalmic complications                 |
|                            | 05472 | Herpes simplex meningitis                                          |
|                            | 05479 | Herpes simplex + other spec. Complications                         |
|                            | 05810 | Roseola infantum, unspecified                                      |
|                            | 05829 | Other human herpesvirus encephalitis                               |
|                            | 0784  | Foot and mouth disease                                             |
| <b>Hepatitis</b>           | 0701  | Viral hepatitis a without hepatic coma                             |
|                            | 0701  | Viral hepatitis a without mention of hepatic coma                  |
|                            | 0709  | Unsp. Viral hepatitis without hepatic coma                         |
|                            | 0709  | Unspecified viral hepatitis without mention of hepatic coma        |
|                            | 07030 | Viral hepatitis b without hepatic coma & hepatitis delta -92       |
|                            | 07030 | Viral hepatitis b without hepatic coma,ac/unsp.without hep. Delta  |
|                            | 07032 | Viral hepatitis b without hepatic coma,chr. Without hepatitis delt |
|                            | V0261 | Hepatitis b carrier                                                |
|                            | V0262 | Hepatitis c carrier                                                |
| <b>EBV, CMV</b>            | 075   | Infectious mononucleosis                                           |
|                            | 0785  | Cytomegalic inclusion disease                                      |
|                            | 0785  | Cytomegaloviral disease                                            |
| <b>Warts</b>               | 0780  | Molluscum contagiosum                                              |
|                            | 0781  | Viral warts                                                        |
|                            | 07810 | Viral warts, unspecified                                           |
|                            | 07811 | Condyloma acuminatum                                               |
|                            | 07812 | Plantar wart                                                       |
|                            | 07819 | Other specified viral warts                                        |
| <b>Viral infection NOS</b> | 0790  | Adenovirus inf.in conditions classif.elsewhere,unsp.site           |
|                            | 0790  | Adenovirus infection, unsp. Site                                   |
|                            | 0791  | Echo virus infection, unsp. Site                                   |
|                            | 0792  | Coxsackie virus infection, unsp. Site                              |
|                            | 0793  | Rhinovirus infection, unsp. Site                                   |

|                         |       |                                                                |
|-------------------------|-------|----------------------------------------------------------------|
|                         | 0798  | Other specified viral infection classif.elsewhere,unsp.site    |
|                         | 0799  | Unsp. Viral & chlamydial infection                             |
|                         | 0799  | Unsp.viral infect.in conditions classif.elsewhere,unsp.site    |
|                         | 07889 | Other specified diseases due to viruses                        |
|                         | 07889 | Other specified diseases due to viruses and chlamydiae         |
|                         | 07950 | Retrovirus, unsp.,unsp. Site                                   |
|                         | 07959 | Other specified retrovirus                                     |
|                         | 07989 | Other spec. Viral infection                                    |
|                         | 07999 | Unsp. Viral infection                                          |
|                         | 07999 | Unsp. Viral infection (additional code)                        |
| <b>RSV infection</b>    | 0796  | Respiratory syncytial virus (rsv)                              |
| <b>Fungal infection</b> | 1100  | Dermatophytosis of scalp and beard                             |
|                         | 1101  | Dermatophytosis of nail                                        |
|                         | 1103  | Dermatophytosis of groin and perianal area                     |
|                         | 1104  | Dermatophytosis of foot                                        |
|                         | 1105  | Dermatophytosis of the body                                    |
|                         | 1109  | Dermatophytosis of unspecified site                            |
|                         | 1110  | Pityriasis versicolor                                          |
|                         | 1118  | Other specified dermatomycoses                                 |
|                         | 1119  | Dermatormycosis, unspecified                                   |
|                         | 1120  | Candidiasis of mouth                                           |
|                         | 1121  | Candidiasis of vulva and vagina                                |
|                         | 1122  | Candidiasis of other urogenital sites                          |
|                         | 1123  | Candidiasis of skin and nails                                  |
|                         | 1124  | Candidiasis of lung                                            |
|                         | 1129  | Candidiasis of unspecified site                                |
|                         | 11281 | Candidal endocarditis                                          |
|                         | 11282 | Candidal otitis externa                                        |
|                         | 11284 | Candidal esophagitis                                           |
|                         | 11289 | Other candidiasis of other specified sites                     |
| <b>Otitis</b>           | 382   | Suppurative and unspecified otitis media                       |
|                         | 3813  | Other and unspecified chronic nonsuppurative otitis media      |
|                         | 3814  | Nonsuppurative otitis media, not specified as acute or chronic |
|                         | 3819  | Unspecified eustachian tube disorder                           |
|                         | 3820  | Acute suppurative otitis media                                 |
|                         | 3821  | Chronic tubotympanic suppurative otitis media                  |
|                         | 3823  | Unspecified chronic suppurative otitis media                   |
|                         | 3824  | Unspecified suppurative otitis media                           |
|                         | 3829  | Unspecified otitis media                                       |
|                         | 3831  | Chronic mastoiditis                                            |
|                         | 3839  | Unspecified mastoiditis                                        |



|                                    |       |                                                              |
|------------------------------------|-------|--------------------------------------------------------------|
|                                    | 3841  | Chronic myringitis without mention of otitis media           |
|                                    | 3849  | Unspecified disorder of tympanic membrane                    |
|                                    | 38001 | Acute perichondritis of pinna                                |
|                                    | 38002 | Chronic perichondritis of pinna                              |
|                                    | 38003 | Chondritis of pinna                                          |
|                                    | 38010 | Infective otitis externa, unspecified                        |
|                                    | 38015 | Chronic mycotic otitis externa                               |
|                                    | 38022 | Other acute otitis externa                                   |
|                                    | 38023 | Other chronic otitis externa                                 |
|                                    | 38100 | Acute nonsuppurative otitis media, unspecified               |
|                                    | 38101 | Acute serous otitis media                                    |
|                                    | 38104 | Acute allergic serous otitis media                           |
|                                    | 38110 | Chronic serous otitis media, simple or unspecified           |
|                                    | 38119 | Other chronic serous otitis media                            |
|                                    | 38129 | Other chronic mucoid otitis media                            |
|                                    | 38200 | Ac.suppurat.otitis media without spontan.rupture of eardrum  |
|                                    | 38201 | Acute suppurat.otitis media with spontan.rupture of eardrum  |
|                                    | 38300 | Acute mastoiditis without complications                      |
|                                    | 38301 | Subperiosteal abscess of mastoid                             |
|                                    | 38330 | Postmastoidectomy complication, unspecified                  |
|                                    | 38389 | Other disorders of mastoid                                   |
|                                    | 38400 | Acute myringitis, unspecified                                |
|                                    | 38401 | Bullous myringitis                                           |
|                                    | 38420 | Perforation of tympanic membrane, unspecified                |
|                                    | 38482 | Atrophic nonflaccid tympanic membrane                        |
|                                    | 38500 | Tympanosclerosis, unspecified as to involvement              |
|                                    | 38510 | Adhesive middle ear disease, unspecified as to involvement   |
|                                    | 38530 | Cholesteatoma, unspecified                                   |
|                                    | 38531 | Cholesteatoma of attic                                       |
|                                    | 38532 | Cholesteatoma of middle ear                                  |
|                                    | 38630 | Labyrinthitis, unspecified                                   |
|                                    | 38635 | Viral labyrinthitis                                          |
| <b>Upper respiratory infection</b> | 460   | Acute nasopharyngitis (common cold)                          |
|                                    | 462   | Acute pharyngitis                                            |
|                                    | 463   | Acute tonsillitis                                            |
|                                    | 464   | Acute laryngitis and tracheitis                              |
|                                    | 465   | Acute upper respiratory infections of multiple or unsp.sites |
|                                    | 475   | Peritonsillar abscess                                        |
|                                    | 4610  | Acute maxillary sinusitis                                    |
|                                    | 4611  | Acute frontal sinusitis                                      |
|                                    | 4612  | Acute ethmoidal sinusitis                                    |

|                      |       |                                                            |
|----------------------|-------|------------------------------------------------------------|
|                      | 4613  | Acute sphenoidal sinusitis                                 |
|                      | 4618  | Other acute sinusitis                                      |
|                      | 4619  | Acute sinusitis, unspecified                               |
|                      | 4640  | Acute laryngitis                                           |
|                      | 4644  | Croup                                                      |
|                      | 4650  | Acute laryngopharyngitis                                   |
|                      | 4658  | Acute upper respiratory infections of other multiple sites |
|                      | 4659  | Acute upper respiratory infections of unspecified site     |
|                      | 4720  | Chronic rhinitis                                           |
|                      | 4730  | Chronic maxillary sinusitis                                |
|                      | 4731  | Chronic frontal sinusitis                                  |
|                      | 4732  | Chronic ethmoidal sinusitis                                |
|                      | 4733  | Chronic sphenoidal sinusitis                               |
|                      | 4738  | Other chronic sinusitis                                    |
|                      | 4739  | Unspecified sinusitis (chronic)                            |
|                      | 4741  | Hypertrophy of tonsils and adenoids                        |
|                      | 4742  | Adenoid vegetations                                        |
|                      | 4748  | Other chronic disease of tonsils and adenoids              |
|                      | 4749  | Unspecified chronic disease of tonsils and adenoids        |
|                      | 4870  | Influenza with pneumonia                                   |
|                      | 4871  | Influenza with other respiratory manifestations            |
|                      | 4878  | Influenza with other manifestations                        |
|                      | 4880  | Influenza due to identified avian influenza virus          |
|                      | 4881  | Influenza due to identified novel h1n1 influenza virus     |
|                      | 46400 | Acute laryngitis without mention of obstruction            |
|                      | 46410 | Acute tracheitis without mention of obstruction            |
|                      | 46420 | Acute laryngotracheitis without mention of obstruction     |
|                      | 46430 | Acute epiglottitis without mention of obstruction          |
|                      | 46450 | Supraglottitis without mention of obstruction              |
|                      | 47400 | Chronic tonsillitis                                        |
|                      | 47401 | Chronic adenoiditis                                        |
|                      | 47410 | Hypertrophy of tonsil with adenoids                        |
|                      | 47411 | Hypertrophy of tonsils alone                               |
|                      | 47412 | Hypertrophy of adenoids alone                              |
|                      | 47822 | Parapharyngeal abscess                                     |
|                      | 47824 | Retropharyngeal abscess                                    |
| <b>Bronchiolitis</b> | 466   | Acute bronchitis and bronchiolitis                         |
|                      | 480   | Viral pneumonia                                            |
|                      | 490   | Bronchitis, not specified as acute or chronic              |
|                      | 4660  | Acute bronchitis                                           |
|                      | 4661  | Acute bronchiolitis                                        |
|                      | 4800  | Pneumonia due to adenovirus                                |

|                  |                             |                                                                                             |
|------------------|-----------------------------|---------------------------------------------------------------------------------------------|
|                  | 4801                        | Pneumonia due to respiratory syncytial virus                                                |
|                  | 4802                        | Pneumonia due to parainfluenza virus                                                        |
|                  | 4808                        | Pneumonia due to other virus not elsewhere classified                                       |
|                  | 4809                        | Viral pneumonia, unspecified                                                                |
|                  | 4841                        | Pneumonia in cytomegalic inclusion disease                                                  |
|                  | 4918                        | Other chronic bronchitis                                                                    |
|                  | 46611                       | Ac. Bronchiolitis due to respiratory syncytial virus (rsv)                                  |
|                  | 46619                       | Ac. Bronchiolitis due to other infectious organisms                                         |
|                  | 49121                       | Obstructive chr. Bronchitis with(acute)exacerbation                                         |
|                  | V1261                       | Personal history of pneumonia (recurrent)                                                   |
| <b>Pneumonia</b> | 481                         | Pneumococcal pneumonia                                                                      |
|                  | 481                         | Pneumococcal pneumonia (streptococcus pneumoniae pneumonia)                                 |
|                  | 483                         | Pneumonia due to other specified organism                                                   |
|                  | 4820                        | Pneumonia due to klebsiella pneumoniae                                                      |
|                  | 4821                        | Pneumonia due to pseudomonas                                                                |
|                  | 4822                        | Pneumonia due to hemophilus influenzae (h. Influenzae)                                      |
|                  | 4823                        | Pneumonia due to streptococcus                                                              |
|                  | 4829                        | Bacterial pneumonia, unspecified                                                            |
|                  | 4830                        | Pneumonia due to mycoplasma pneumoniae                                                      |
|                  | 4831                        | Pneumonia due to chlamydia                                                                  |
|                  | 4838                        | Pneumonia due to other specified organism                                                   |
|                  | 48230                       | Pneumonia due to streptococcus, unspecified                                                 |
|                  | 48231                       | Pneumonia due to streptococcus, group a                                                     |
|                  | 48241                       | Pneumonia due to staphylococcus aureus                                                      |
|                  | 99590                       | Systemic inflammatory response syndrome, unspecified                                        |
|                  | 99591                       | Sepsis                                                                                      |
|                  | 99591                       | Systemic inflammatory response syndrome due to infectious process without organ dysfunction |
|                  | 99592                       | Severe sepsis                                                                               |
|                  | 99592                       | Systemic inflammatory response syndrome due to infectious process with organ dysfunction    |
|                  | <b>Mycoplasma infection</b> | 04181                                                                                       |
| 04181            |                             | Other mycoplasma infection (additional code)                                                |
| <b>Other</b>     | 101                         | Vincent's angina                                                                            |
|                  | 0400                        | Gas gangrene                                                                                |
|                  | 0990                        | Chancroid                                                                                   |
|                  | 0993                        | Reiter's disease                                                                            |
|                  | 0999                        | Venereal disease, unspecified                                                               |
|                  | 1236                        | Hymenolepiasis                                                                              |
|                  | 1307                        | Toxoplasmosis of other specified sites                                                      |
|                  | 1309                        | Toxoplasmosis, unspecified                                                                  |

|  |       |                                    |
|--|-------|------------------------------------|
|  | 1320  | Pediculus capitis (head louse)     |
|  | 1322  | Phthirus pubis (pubic louse)       |
|  | 1323  | Mixed pediculosis infestation      |
|  | 1329  | Pediculosis, unspecified           |
|  | 1330  | Scabies                            |
|  | 1340  | Myiasis                            |
|  | 04082 | Toxic shock syndrome               |
|  | 04089 | Other specified bacterial diseases |
|  | 04184 | Other anaerobes infection          |
|  | 05442 | Dendritic keratitis                |
|  | 07988 | Other spec. Chlamydial infection   |
|  | 07998 | Unsp. Chlamydial infection         |
